# Supplementary material
Source: Springer Nature journal article supplement (https://www.springermedizin.de/resource/supplementary/12933_2011_373_MOESM1_ESM.pdf/9538272)

Hazard ratio

3

2

1

0

Diet + pravastatin

Diet alone

<6.0

6.0–<6.5

≥6.5

HbA1c, %

\*

\*\*

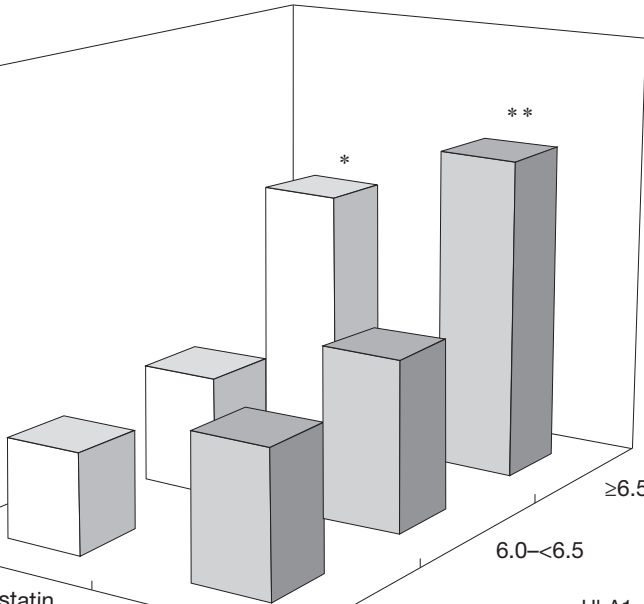

Supplement: MOESM1 [file 9538272]
